# Supplementary material for: Cationic Polyene Phospholipids as DNA Carriers for Ocular Gene Therapy
Source: Biomed Res Int. 2014 Jul 24;2014:703253. doi: 10.1155/2014/703253 (PMC4131563; doi:10.1155/2014/703253)
Supplement: Supplementary file 1 — S1: Transfection efficiency of novel cationic polyene lipids in another retinal cell line, D407. Comparison with Gene Juice, a commercial reagent, shows a similar trend. S2: Flow cytometry scatter plots for cell transfection with the novel cationic polyene lipids. [file 703253.f1.zip]

Archive with 61 entries (60 files):
- C20-18 1.tif
- C20-18 2.tif
- C20-18 3.tif
- C20-18 4.tif
- C20-18 5.tif
- C20-18 6.tif
- C20-20 1.tif
- C20-20 2.tif
- C20-20 3.tif
- C20-20 4.tif
- C20-20 5.tif
- C20-20 6.tif
- C30-20 1.tif
- C30-20 2.tif
- C30-20 3.tif
- C30-20 4.tif
- C30-20 5.tif
- C30-20 6.tif
- DC-Chol 1.tif
- DC-Chol 2.tif
- DC-Chol 3.tif
- DC-Chol 4.tif
- DC-Chol 5.tif
- DC-Chol 6.tif
- EPC 1.tif
- EPC 2.tif
- EPC 3.tif
- EPC 4.tif
- EPC 5.tif
- EPC 6.tif
- suplementary figures/
- suplementary figures/C20-18 1.eps
- suplementary figures/C20-18 2.eps
- suplementary figures/C20-18 3.eps
- suplementary figures/C20-18 4.eps
- suplementary figures/C20-18 5.eps
- suplementary figures/C20-18 6.eps
- suplementary figures/C20-20 1.eps
- suplementary figures/C20-20 2.eps
- suplementary figures/C20-20 3.eps
- suplementary figures/C20-20 4.eps
- suplementary figures/C20-20 5.eps
- suplementary figures/C20-20 6.eps
- suplementary figures/C30-20 1.eps
- suplementary figures/C30-20 2.eps
- suplementary figures/C30-20 3.eps
- suplementary figures/C30-20 4.eps
- suplementary figures/C30-20 5.eps
- suplementary figures/C30-20 6.eps
- suplementary figures/DC-Chol 1.eps
- suplementary figures/DC-Chol 2.eps
- suplementary figures/DC-Chol 3.eps
- suplementary figures/DC-Chol 4.eps
- suplementary figures/DC-Chol 5.eps
- suplementary figures/DC-Chol 6.eps
- suplementary figures/EPC 1.eps
- suplementary figures/EPC 2.eps
- suplementary figures/EPC 3.eps
- suplementary figures/EPC 4.eps
- suplementary figures/EPC 5.eps
- suplementary figures/EPC 6.eps
